# Supplementary material for: Matrix-M™ adjuvation broadens protection induced by seasonal trivalent virosomal influenza vaccine
Source: PubMed Central journal article supplement (PMC4672496; doi:10.1186/s12985-015-0435-9), 2015-12-08

# Supplementary Figure 2

A

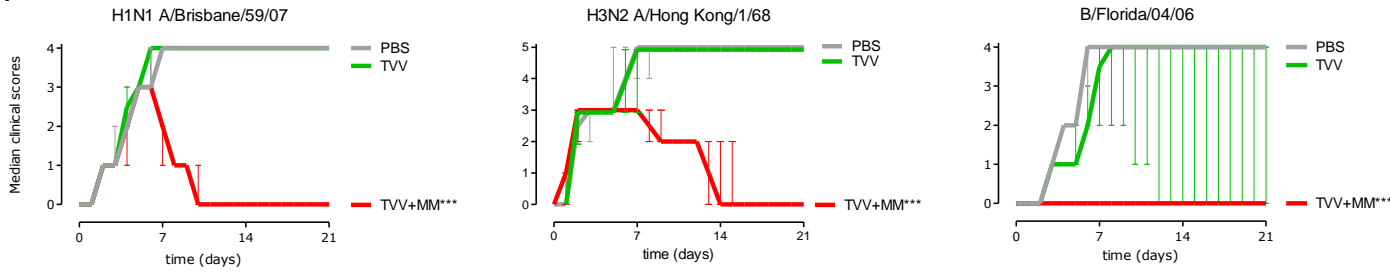

B

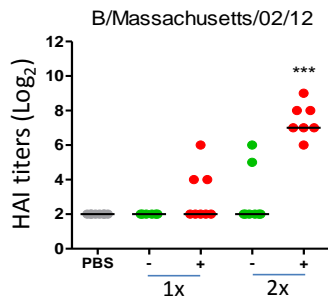

Supplement: 12985_2015_435_MOESM3_ESM.pdf [file 12985_2015_435_MOESM3_ESM.pdf]
