# Supplementary material for: Matrix-M™ adjuvation broadens protection induced by seasonal trivalent virosomal influenza vaccine
Source: Virol J. 2015 Dec 8;12:210. doi: 10.1186/s12985-015-0435-9 (PMC4672496; doi:10.1186/s12985-015-0435-9)
Supplement: Additional file 6: Figure S5. — Alignment of B-strains based on hemagglutinin amino acid sequence. B/Bris = B/Brisbane/60/08 [GenBank: ACN29380.1], B/Mal = B/Malaysia/2506/04 [GenBank: ACR15732], B/Florida = B/Florida/04/06 [GenBank: ACF54246.1], B/Mass = B/Massachusetts/02/12 [GenBank: AGL06036.1]. Blue bar indicates head domain defined as Asn58 to Glu307. (PDF 156 kb) [file 12985_2015_435_MOESM6_ESM.pdf]

B/Bris **MKA I I V L L M V T S N A D R I C T G I T S S N S P H V V K T A T Q G E V N V T G V I P L T T T P T K S H F A N L K G T E T R G K L C P K C L N C T D L D V A L G R P** 85  
 B/Mal ..... 85  
 B/Florida ..... Y ..... R ..... D ..... 85  
 B/Mass ..... Y ..... K ..... D ..... 85  
 B/Bris **K C T G K I P S A R V S I L H E V R P V T S G C F P I M H D R T K I R Q L P N L L R G Y E H I R L S T H N V I N A E N A P G G P Y K I G T S G S C P N I T N G N G F F A T** 170  
 B/Mal ..... N ..... V ..... 170  
 B/Florida **M . V . T T . . . K A . . . . K . . . . N . . . . Q . . . D . . K . . . . R L . . . . A . S K S . . . .** 170  
 B/Mass **M . V . T T . . . K A . . . . A . . . . N . . . . Q . . . D . . K . . . . R L . . . . A . S K S . . . .** 170  
 B/Bris **M A W A V P K N D K N K T A T N P L T I E V P Y I C T E G E D Q I T V W G F H S D N E T Q M A K L Y G D S K P Q K F T S S A N G V T T H Y V S Q I G G F P N Q T E D G G L** 255  
 B/Mal ..... N ..... S ..... I ..... 255  
 B/Florida ..... N . N . . V . . . . . D K . . . K N . . . N . . . . . S . D . . . 254  
 B/Mass ..... N . N . . V . . . . . A . . . . . D K . . . K N . . . N . . . . . D . . . . 254  
 B/Bris **P Q S G R I V V D Y M V Q K S G K T G T I T Y Q R G I L L P Q K V W C A S G R S K V I K G S L P L I G E A D C L H E K Y G G L N K S K P Y Y T G E H A K A I G N C P I W V** 340  
 B/Mal ..... 340  
 B/Florida ..... M . P . . . V . . . V . . . . . 339  
 B/Mass ..... M . P . . . V . . . V . . . . . 339  
 B/Bris **K T P L K L A N G T K Y R P P A K L L K E R G F F G A I A G F L E G G W E G M I A G W H G Y T S H G A H G V A A A D L K S T Q E A I N K I T K N L N S L S E L E V K N L** 425  
 B/Mal ..... 425  
 B/Florida ..... 424  
 B/Mass ..... 424  
 B/Bris **Q R L S G A M D E L H N E I L E L D E K V D D L R A D T I S S Q I E L A V L L S N E G I N S E D E H L L A L E R K L K K M L G P S A V E I G N G C F E T K H K C N Q T C** 510  
 B/Mal ..... 510  
 B/Florida ..... 509  
 B/Mass ..... D ..... 509  
 B/Bris **L D R I A A G T F D A G E F S L P T F D S L N I T A A S L N D D G L D N H T I L L Y S T A A S S L A V T L M I A I F V V Y M V S R D N V S C S I C L** 585  
 B/Mal ..... 585  
 B/Florida ..... N ..... L . I ..... 584  
 B/Mass ..... N ..... L . I ..... 584
