# Supplementary material for: Matrix-M™ adjuvation broadens protection induced by seasonal trivalent virosomal influenza vaccine
Source: Springer Nature journal article supplement (doi:10.1186/s12985-015-0435-9), 2015-12-01
Supplement: MOESM5 [file 9770458]

# Supplementary Figure 4

|          |                                                                                                                                       |     |  |     |   |     |   |     |     |     |    |   |    |     |    |     |     |
|----------|---------------------------------------------------------------------------------------------------------------------------------------|-----|--|-----|---|-----|---|-----|-----|-----|----|---|----|-----|----|-----|-----|
|          |                                                                                                                                       | 20  |  | 40  |   | 60  |   | 80  |     |     |    |   |    |     |    |     |     |
| H3/Vic   | <b>MKT I I ALSY I LCLVFAQKLP</b> GN <del>DN</del> STATLCLGHHAVPNGT I VKT I TNDQ I EVTNATELVQNSSTGE I <b>CDSPHQ I LDGKNCT L I DA</b>   |     |  |     |   |     |   |     | 85  |     |    |   |    |     |    |     |     |
| H3/Perth | .....                                                                                                                                 |     |  |     |   |     |   | S   | 85  |     |    |   |    |     |    |     |     |
| H3/HK    | ..... F . <b>ALG.D</b> .....                                                                                                          |     |  | L   | D | S   | K | NN  | R   | ID  | 85 |   |    |     |    |     |     |
|          |                                                                                                                                       | 100 |  | 120 |   | 140 |   | 160 |     |     |    |   |    |     |    |     |     |
| H3/Vic   | <b>LLGDPQCDG</b> FQNK <b>KWDLFVER</b> SKAYSNCYPYDVPDYASLRSLVASSGTL <b>EFNNE</b> SFNWTGVTQNGTSSAC IRRSKNSFFSRL <b>NWL</b>              |     |  |     |   |     |   |     | 170 |     |    |   |    |     |    |     |     |
| H3/Perth | .....                                                                                                                                 |     |  |     |   |     |   |     | 170 |     |    |   |    |     |    |     |     |
| H3/HK    | ..... H . V . . <b>ET</b> .....                                                                                                       |     |  | F   |   | I   | T | G   | T   | G   | N  | K | GP | G   | S  | 170 |     |
|          |                                                                                                                                       | 180 |  | 200 |   | 220 |   | 240 |     |     |    |   |    |     |    |     |     |
| H3/Vic   | <b>THLNFKYPALNV</b> TMPN <b>NEQFDKLY</b> IWGVHHPVT <b>DKDQ I FLYAQASGR I TVSTKRSQQTV I PNI</b> GSRPRVRNIPTRIS IYWT I <b>VKP</b>       |     |  |     |   |     |   |     | 255 |     |    |   |    |     |    |     |     |
| H3/Perth | .....                                                                                                                                 |     |  | G   |   |     |   | S   |     | S   |    |   |    | 255 |    |     |     |
| H3/HK    | ..... <b>KSGST</b> . V . . . . . <b>DN</b> .....                                                                                      |     |  | S   | N | Q   | E | T   | S   | V   | V  | R | I  | W   | GL | SS  | 255 |
|          |                                                                                                                                       | 260 |  | 280 |   | 300 |   | 320 |     | 340 |    |   |    |     |    |     |     |
| H3/Vic   | <b>GDILL I NSTGNL I APRGYFKMQSGKSS I MRSDAP I GKC</b> NSEC ITPNGS I <b>PNDKPFQNVNR I TYGACPRYVKQNTLKLATGMRNVP</b>                     |     |  |     |   |     |   |     |     | 340 |    |   |    |     |    |     |     |
| H3/Perth | .....                                                                                                                                 |     |  | I   | R |     |   |     |     |     |    |   |    |     |    |     | 340 |
| H3/HK    | ..... V . V . . N . . . . . <b>RT</b> .....                                                                                           |     |  | D   | T | I   |   | K   |     | K   |    |   |    |     |    |     | 340 |
|          |                                                                                                                                       | 360 |  | 380 |   | 400 |   | 420 |     |     |    |   |    |     |    |     |     |
| H3/Vic   | <b>EKQTRG I FGA I AGF I ENG</b> WEGMVDGWYGF <b>FRHQNSEGRGQAADLKSTQAA I DQ I</b> NGKLNRL I <b>GKTNEKFHQ I EKEFSEVEGR I QDL</b>         |     |  |     |   |     |   |     |     | 425 |    |   |    |     |    |     |     |
| H3/Perth | .....                                                                                                                                 |     |  |     |   |     |   |     |     |     |    |   |    |     |    |     | 425 |
| H3/HK    | ..... L . . . . . I . . . . . <b>T</b> .....                                                                                          |     |  |     |   |     |   | V   | E   |     |    |   |    |     |    |     | 425 |
|          |                                                                                                                                       | 440 |  | 460 |   | 480 |   | 500 |     |     |    |   |    |     |    |     |     |
| H3/Vic   | <b>EKYVEDTK I DLWSYNAELLVA</b> ENQHT I <b>DLT</b> SEM <b>NKLF</b> EKTK <b>KLRENAEDMGNGCFK I YHKCDNAC I GS I</b> RNGTYDHN <b>VYRDE</b> |     |  |     |   |     |   |     |     | 510 |    |   |    |     |    |     |     |
| H3/Perth | .....                                                                                                                                 |     |  |     |   |     |   |     |     | D   |    |   |    |     |    |     | 510 |
| H3/HK    | .....                                                                                                                                 |     |  |     |   |     |   | RR  |     |     |    |   | E  |     | D  |     | 510 |
|          |                                                                                                                                       | 520 |  | 540 |   | 560 |   |     |     |     |    |   |    |     |    |     |     |
| H3/Vic   | <b>ALNNRFQ I KGV</b> ELKSGY <b>KDW I LW I SFA I SCFLLC</b> VALLGFIM <b>WACQKGN I RCN I C I</b>                                        |     |  |     |   |     |   |     |     | 566 |    |   |    |     |    |     |     |
| H3/Perth | .....                                                                                                                                 |     |  |     |   |     |   |     |     | 566 |    |   |    |     |    |     |     |
| H3/HK    | .....                                                                                                                                 |     |  |     |   |     |   | V   |     | R   |    |   |    |     |    |     | 566 |
